# Supplementary material for: Social isolation during the COVID-19 pandemic is associated with the decline in cognitive functioning in young adults
Source: PeerJ. 2023 Dec 8;11:e16532. doi: 10.7717/peerj.16532 (PMC10712315; doi:10.7717/peerj.16532)
Supplement: Supplemental Information 1 [file peerj-11-16532-s001.xlsx]

## Sheet: Sheet1
						AST Test								PRM Test	CRT Test
	Sr. No.	Gender	Age	MMSE	EHI	AST Congruency cost (Mean, correct)	AST Mean correct latency (blocks 3,5) [non-switching blocks]	AST Mean correct latency (block 7) [switching block]	AST Switching cost (Mean, correct)	AST Mean correct latency	AST Mean correct latency (congruent)	AST Mean correct latency (incongruent)	AST Percent correct trials	PRM Percent correct	CRT Mean correct latency	CRT Percent correct trials
Socially isolated group	1	Male	23	29	100	98.9048	658.587	782.097	123.51	714.482	669	767.905	85.625	91.6667	466.125	96
	2	Male	22	25	100	-5.74082	553.74	889.987	336.248	728.5	731.295	725.554	95	100	470.602	98
	3	Male	21	26	100	7.54915	447.81	444.071	-3.73892	445.974	443.59	451.139	71.25	66.6667	369.545	99
	4	Male	21	25	100	88.9849	474.436	953.267	478.831	709.157	666.7	755.685	95.625	91.6667	423.28	100
	5	Male	21	29	100	96.8326	698.538	1135.63	437.091	892.107	848.532	945.365	87.5	75	547.818	99
	6	Male	22	24	100	42.2588	572.176	983.585	411.409	764.561	745.408	787.667	86.875	100	409.134	97
	7	Male	22	26	100	99.2595	467.722	577.933	110.212	521.396	473.7	572.959	96.25	95.8333	345.33	100
	8	Male	21	25	100	98.728	429.724	486.275	56.5517	456.634	411.696	510.424	90.625	87.5	329.91	100
	9	Male	21	25	100	143.328	503.193	842.667	339.474	672.93	606.295	749.623	71.25	83.3333	540.566	99
	10	Male	20	25	100	54.0964	541.5	841.364	299.864	678.938	654.519	708.615	90	83.3333	404.29	100
	11	Male	20	24	100	110.85	568.077	603.867	35.7897	585.256	541.803	652.653	78.125	62.5	363.62	100
	12	Male	20	24	100	72.1534	541.909	984	442.091	752.429	717.579	789.732	91.875	87.5	530.735	98
	13	Male	22	25	100	78.7095	534.9	772.532	237.632	651.446	612.342	691.051	98.125	100	513.69	100
	14	Male	21	25	100	-0.939104	604.644	684.333	79.6893	643.802	644.101	643.162	72.5	66.6667	769.616	99
	15	Male	21	25	100	111.094	677.177	966.932	289.755	818.463	760.621	871.714	75.625	100	451.646	96
	16	Male	23	25	100	39.1239	520.152	912.556	392.404	694.246	676.338	715.462	88.75	75	393.735	98
	17	Male	22	24	100	66.1478	372.253	470.297	98.0441	419.673	388.113	454.26	95.625	87.5	347.97	100
	18	Male	23	25	100	241.031	667.81	802.259	134.449	732.634	657.312	898.343	70	75	367.59	100
	19	Male	22	24	100	75.6625	814.625	539.593	-275.032	682.699	655.633	731.295	76.875	66.6667	404.828	99
	20	Male	22	28	98	44.2033	636.532	1013.12	376.583	826.039	804.65	848.853	96.875	91.6667	404.92	100
	21	Male	23	25	100	190.705	678.365	639.244	-39.1206	662.065	580.839	771.543	67.5	83.3333	609.577	97
	22	Male	22	24	100	91.6342	658.178	1084.76	426.586	870	826.395	918.029	90.625	70.8333	436.57	100
	23	Male	20	25	100	86.0615	436.618	701.851	265.232	560.888	521.769	607.831	89.375	87.5	376.85	100
	24	Male	24	24	100	13.1862	676.418	874.964	198.546	765.926	760.63	773.816	76.25	75	507.88	100
	25	Male	20	24	100	86.4651	645.677	534.586	-111.091	591.983	561	647.465	75	87.5	410.224	98
	26	Male	21	26	100	-2.44389	572.444	592.825	20.3801	582.125	583.082	580.638	75	54.1667	456.093	97
	27	Male	22	29	100	19.8344	450.298	448.9	-1.39825	449.581	443.139	462.974	73.125	87.5	358.348	46
	28	Male	22	27	100	107.222	490.684	721.211	230.528	599.8	548.333	655.556	93.75	83.3333	451.872	94
	29	Male	22	27	100	65.1069	624.408	850.324	225.915	737.366	707.105	772.212	88.75	100	394.531	98
	30	Male	21	27	100	217.601	586.068	925.758	339.69	765.424	687.087	904.689	78.125	79.1667	440.1	100
	31	Male	22	27	100	125.019	698.382	626.672	-71.7097	660.672	619.718	744.737	72.5	75	548.64	100
	32	Male	19	26	100	-68.355	842.257	663.955	-178.303	742.949	767.176	698.821	49.375	70.8333	516.57	100
	33	Male	21	28	97	-18.6969	603.521	829.964	226.443	724.437	730.609	711.912	64.375	79.1667	393.94	100
	34	Male	20	28	100	-10.108	517.425	701.5	184.075	607.531	612.479	602.371	89.375	95.8333	550.939	99
	35	Male	21	28	100	65.822	563.3	512.328	-50.9721	537.603	515.3	581.122	75.625	91.6667	498.02	99
	36	Male	21	28	100	87.1013	744.383	622.931	-121.452	684.686	655.899	743	73.75	62.5	494.697	99
	37	Male	20	27	100	69.7338	597.909	734.208	136.299	666.058	632.55	702.284	96.25	83.3333	473.162	99
	38	Male	20	29	96	57.7316	536.359	1043.89	507.534	785.15	757.228	814.959	95.625	91.6667	548.4	100
	39	Male	21	26	95	180.894	614	1024.71	410.706	832.188	761.526	942.42	80	75	451.45	100
	40	Male	22	26	100	92.3846	505.367	516.404	11.0368	510.744	479.949	572.333	73.125	79.1667	461.505	97
	41	Male	21	25	97	132.038	848.964	1094.59	245.629	979.967	931.553	1063.59	75	75	570.404	99
	42	Male	19	25	100	-325.602	661.905	1151.63	489.73	1010.75	1171.32	845.722	45.625	83.3333	461.182	99
	43	Male	19	24	100	74.556	844.826	982	137.174	917.612	883.377	957.933	61.25	70.8333	898.36	100
	44	Male	22	24	100	192.97	535.133	650.934	115.801	593.417	501.405	694.375	94.375	83.3333	388.86	100
	45	Male	21	27	100	182.934	771.971	1012.77	240.799	924.979	841.135	1024.07	60	58.3333	838.71	100
	46	Male	23	24	98	46.5551	1158.34	1221.34	63.0015	1186.73	1167.8	1214.35	56.875	66.6667	861.245	98
	47	Male	21	24	100	133.958	529.673	532.596	2.92376	531.161	486.907	620.865	70	70.8333	487.258	97
	48	Male	21	26	100	160.802	511.187	666.486	155.3	588.315	513.85	674.652	93.125	95.8333	413.75	100
Non-isolated grouop	1	Male	24	26	100	46.29	412.57	486.94	74.37	449.28	426.72	473.01	97.5	91.67	351.68	99
	2	Male	25	30	100	78.83	551.18	918.56	367.38	737.22	698.32	777.14	97.5	79.17	454.29	98
	3	Male	18	27	100	57.73	493.26	668.92	175.66	579.93	552.59	610.32	95	100	454.26	99
	4	Male	24	30	100	41.21	450.04	460.46	10.42	455.12	435.04	476.25	97.5	100	411.07	99
	5	Male	25	29	100	55.01	420.12	497.84	77.72	458.24	431.26	486.27	98.12	87.5	428.53	99
	6	Male	24	30	100	78.51	439.71	506.53	66.83	472.9	434.91	513.43	96.88	91.67	425.76	95
	7	Male	26	30	100	58	490.49	723.22	232.73	607.59	578.78	636.77	99.38	100	480.43	100
	8	Male	19	29	100	98.57	513	778.34	265.34	638.5	593.21	691.78	92.5	91.67	413.27	99
	9	Male	25	28	100	44.86	493.46	697.86	204.41	596.3	574.01	618.87	99.38	100	428.88	99
	10	Male	26	28	100	49.07	517.16	638.99	121.82	578.08	553.85	602.92	98.75	95.83	500.67	98
	11	Male	23	26	100	50.02	604.29	1024.19	419.89	808.72	785.02	835.04	95	100	434.9	99
	12	Male	23	28	100	79.27	446.03	680.49	234.46	559.32	521.55	600.82	93.12	75	376.18	99
	13	Male	26	27	100	47.96	589.54	846.12	256.58	716.12	692.78	740.74	93.75	75	536.99	93
	14	Male	23	28	100	83.79	553.49	649.49	95.99	601.79	560.16	643.95	99.38	95.83	455.2	96
	15	Male	24	29	100	45.03	442.14	526.76	84.62	484.45	462.51	507.54	97.5	100	415.15	99
	16	Male	23	30	100	63.29	520.76	789.14	268.38	654.11	622.66	685.95	99.38	100	432.9	98
	17	Male	23	28	100	104.66	498	626.75	128.75	559.76	511.68	616.34	92.5	83.33	481.51	99
	18	Male	23	29	100	20.25	449.61	551.63	102.02	500.29	490.36	510.61	98.12	100	487.56	99
	19	Male	20	30	100	148.96	599.71	1078.57	478.86	823.18	750.69	899.64	93.75	95.83	448.37	99
	20	Male	23	28	100	56.65	519.49	841.78	322.29	680.63	653.04	709.68	97.5	83.33	405.77	99
	21	Male	23	27	100	141.63	553.58	712.04	158.46	633.31	563.85	705.48	98.12	95.83	436.18	100
	22	Male	21	27	100	16.08	679.3	1031.08	351.78	852.88	845.15	861.23	95	79.17	511.63	100
	23	Male	24	29	100	41.01	376.96	468.64	91.68	422.22	401.98	442.99	98.75	100	371.23	100
	24	Male	24	29	100	60.8	529.55	460.12	-69.43	495.06	465.64	526.44	96.88	100	409.82	98
	25	Male	24	26	100	24.33	458	444.13	-13.87	451.06	439.21	463.54	97.5	100	442.27	98
	26	Male	21	29	100	61.52	523.81	814.64	290.82	666.45	636.28	697.79	98.12	91.67	462.27	98
	27	Male	23	30	100	25.89	428.63	446.97	18.34	437.8	425.54	451.43	95	100	373.91	98
	28	Male	23	28	100	104.66	498	626.75	128.75	559.76	511.68	616.34	92.5	83.33	481.51	99
	29	Male	21	30	100	38.26	446.54	505.62	59.09	476.08	456.95	495.21	100	100	429.01	99
	30	Male	22	29	100	66.85	458.73	563.1	104.37	510.59	477.8	544.65	98.12	95.83	443.58	98
	31	Male	23	30	100	104.66	498	626.75	128.75	559.76	511.68	616.34	92.5	79.17	393.78	100
	32	Male	21	29	100	83.17	495.91	671.85	175.94	580.45	540.49	623.66	96.25	70.83	615.11	99
	33	Male	22	28	100	32.89	430.71	575.37	144.66	503.04	486.8	519.69	98.75	100	604.91	98
	34	Male	21	30	100	20.54	413.14	602.2	189.06	508.27	498.2	518.74	98.12	100	413.14	100
	35	Male	20	30	100	48.84	552.12	928.89	376.77	732.97	709.85	758.69	93.75	79.17	477.91	100
	36	Male	20	28	100	65.35	633.71	714.62	80.91	674.16	642.32	707.67	97.5	87.5	546.66	92
